# Supplementary material
Source: Springer Nature journal article supplement (https://www.springermedizin.de/resource/supplementary/12936_2007_443_MOESM3_ESM.pdf/9547458)

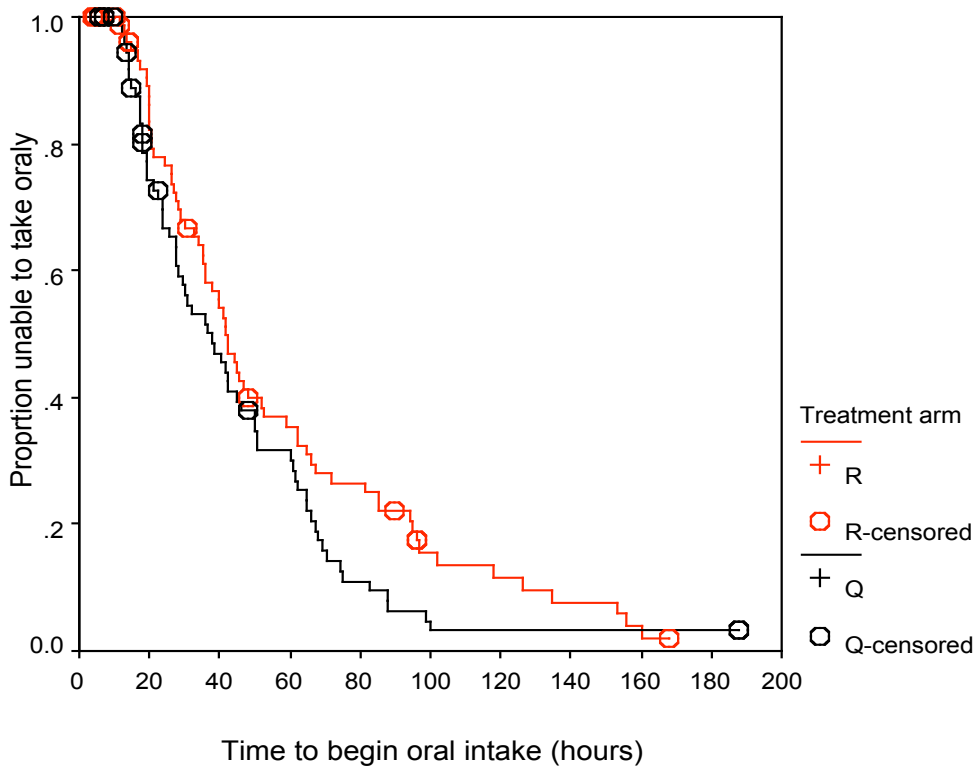

P-value = 0.09, Log Rank test

*Q* = Mannitol, *R* = Placebo

Supplement: MOESM3 [file 9547458]
